# Supplementary material for: Emulsifiers Impact Colonic Length in Mice and Emulsifier Restriction is Feasible in People with Crohn’s Disease
Source: PubMed Central journal article supplement (PMC7551245; doi:10.3390/nu12092827), 2020-09-15
Supplement: nutrients-12-02827-s001.pdf [file nutrients-12-02827-s001.pdf]

**Supplementary Table S1:** Excluded food additives on the low emulsifier diet

| <b>Food additive emulsifier</b>                                 | <b>E number</b> |
|-----------------------------------------------------------------|-----------------|
| Lecithin                                                        | E322            |
| Sodium phosphates                                               | E339i-iii       |
| Alginic acid                                                    | E400            |
| Sodium alginate                                                 | E401            |
| Potassium alginate                                              | E402            |
| Ammonium alginate                                               | E403            |
| Calcium alginate                                                | E404            |
| Propylene glycol alginate                                       | E405            |
| Agar                                                            | E406            |
| Carrageenan                                                     | E407            |
| Processed eucheama seaweed                                      | E407a           |
| Carob bean gum                                                  | E410            |
| Guar gum                                                        | E412            |
| Tragacanth gum                                                  | E413            |
| Gum arabic                                                      | E414            |
| Xanthan gum                                                     | E415            |
| Karaya gum                                                      | E416            |
| Tara gum                                                        | E417            |
| Octenyl succinic acid modified gum arabic                       | E423            |
| Konjac flour                                                    | E425            |
| Soybean hemicellulose                                           | E426            |
| Cassia gum                                                      | E427            |
| Polyoxyethylene (20) sorbitan monolaurate<br>(polysorbate 20)   | E432            |
| Polyoxyethylene (20) sorbitan monooleate<br>(polysorbate 80)    | E433            |
| Polyoxyethylene (20) sorbitan<br>monopalmitate (polysorbate 40) | E434            |
| Polyoxyethylene (20) sorbitan<br>monostearate (polysorbate 60)  | E435            |
| Polyoxyethylene (20) sorbitan tristearate<br>(polysorbate 65)   | E436            |
| Pectins                                                         | E440            |
| Ammonium salts of phosphatidic acid                             | E442            |
| Glycerol esters of rosin                                        | E445            |

| <b>Food additive emulsifier</b>                                                              | <b>E number</b> |
|----------------------------------------------------------------------------------------------|-----------------|
| Diphosphates                                                                                 | E450(i-viii)    |
| Polyphosphates                                                                               | E452(i-vi)      |
| Celluloses                                                                                   | E460(i-ii)      |
| Methyl cellulose                                                                             | E461            |
| Ethyl cellulose                                                                              | E462            |
| Hydroxypropyl cellulose                                                                      | E463            |
| Hydroxypropyl methyl cellulose                                                               | E464            |
| Methyl ethyl cellulose                                                                       | E465            |
| Sodium carboxymethyl cellulose                                                               | E466            |
| Ethyl hydroxyethyl cellulose                                                                 | E467            |
| Cross-linked sodium<br>carboxymethylcellulose                                                | E468            |
| Sodium carboxymethyl cellulose<br>enzymatically hydrolysed                                   | E469            |
| Salts of fatty acids, with base of Ca, Mg, K,<br>Na, Al, NH <sub>3</sub>                     | E470(i-iii)     |
| Mono- and di glycerides of fatty acids                                                       | E471            |
| Acetic and fatty acid esters of glycerol                                                     | E472a           |
| Lactic and fatty acid esters of glycerol                                                     | E472b           |
| Citric and fatty acid esters of glycerol                                                     | E472c           |
| Tartaric acid esters of mono- and di-<br>glycerides of fatty acids                           | E472d           |
| Diacetyltartaric and fatty acid esters of<br>glycerol                                        | E472e           |
| Mixed acetic and tartaric acid esters of<br>mono- and diglycerides of fatty acids            | E472f           |
| Sucrose esters of fatty acids                                                                | E473            |
| Sucroglycerides                                                                              | E474            |
| Polyglycerol esters of fatty acids                                                           | E475            |
| Polyglycerol esters of interesterified<br>ricinoleic acid                                    | E476            |
| Propylene glycol esters of fatty acids                                                       | E477            |
| Lactylated fatty acid esters of glycerol and<br>propylene glycol                             | E478            |
| Thermally oxidised soya bean oil<br>interacted with mono- and diglycerides of<br>fatty acids | E479            |
| Sodium lactylates                                                                            | E481(i-ii)      |
| Calcium lactylates                                                                           | E482(i-ii)      |

| <b>Food additive emulsifier</b> | <b>E number</b> |
|---------------------------------|-----------------|
| Sorbitan monostearate           | E491            |
| Sorbitan tristearate            | E492            |
| Sorbitan monolaurate            | E493            |
| Sorbitan monooleate             | E494            |
| Sorbitan monopalmitate          | E495            |
| Quillaia extracts               | E999(i-ii)      |

**Supplementary Table S2:** Feasibility and acceptability of the low emulsifier diet in 20 people with stable Crohn's disease

| Question                                                             | Response, n (%) |               |        |           |
|----------------------------------------------------------------------|-----------------|---------------|--------|-----------|
|                                                                      | No              | Slightly more | More   | Much more |
| Meal preparation was more difficult                                  | 11 (55)         | 6 (30)        | 3 (15) | 0 (0)     |
| Longer time spent preparing and cooking meals                        | 7 (35)          | 11 (55)       | 2 (10) | 0 (0)     |
| Longer time spent food shopping                                      | 0 (0)           | 8 (40)        | 8 (40) | 3 (15)    |
| Finding suitable foods when shopping was more difficult              | 2 (10)          | 11 (55)       | 6 (30) | 1 (5)     |
| Finding suitable foods when eating out was more difficult            | 6 (30)          | 1 (5)         | 3 (15) | 10 (50)   |
| The flavour of meals and snacks was less appetising                  | 19 (95)         | 1 (5)         | 0 (0)  | 0 (0)     |
| More money spent on food shopping and eating out                     | 5 (25)          | 8 (40)        | 2 (10) | 0 (0)     |
| The diet was more difficult                                          | 2 (10)          | 14 (70)       | 4 (20) | 0 (0)     |
| Following the diet for 6-8 weeks would be more difficult than normal | 2 (10)          | 8 (40)        | 8 (40) | 1 (5)     |
